CORRECTION

# Correction: Rapid gain and loss of a chromosome drives key morphology and virulence phenotypes in the fungal pathogen *Histoplasma*

The *PLOS Biology* Staff

## Notice of Republication

This article was republished on January 28, 2026, to correct errors in Fig 5 and Fig 7 that were introduced during the typesetting process. The publisher apologizes for the errors. Please download this article again to view the correct version. The originally published, uncorrected article and the republished, corrected articles are provided here for reference.

## Supporting information

**S1 File. Originally published, uncorrected article.**

(PDF)

**S2 File. Republished, corrected article.**

(PDF)

## Reference

1. Heater S, Voorhies M, Rodriguez RA, English BC, Sil A. Rapid gain and loss of a chromosome drives key morphology and virulence phenotypes in the fungal pathogen *Histoplasma*. *PLoS Biol.* 2026;24(1):e3003224. <https://doi.org/10.1371/journal.pbio.3003224> PMID: [41490237](https://pubmed.ncbi.nlm.nih.gov/41490237/)

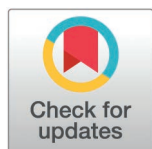

## OPEN ACCESS

**Citation:** The *PLOS Biology* Staff (2026) Correction: Rapid gain and loss of a chromosome drives key morphology and virulence phenotypes in the fungal pathogen *Histoplasma*. *PLoS Biol* 24(2): e3003651. <https://doi.org/10.1371/journal.pbio.3003651>

**Published:** February 10, 2026

**Copyright:** © 2026 The *PLOS Biology* Staff. This is an open access article distributed under the terms of the [Creative Commons Attribution License](https://creativecommons.org/licenses/by/4.0/), which permits unrestricted use, distribution, and reproduction in any medium, provided the original author and source are credited.
